## 1 Neutralization against Omicron SARS-CoV-2 from previous non-Omicron infection

2 Jing Zou<sup>1,\*</sup>, Hongjie Xia<sup>1,\*</sup>, Xuping Xie<sup>1,\*</sup>, Chaitanya Kurhade<sup>1</sup>, Rafael R. G. Machado<sup>2</sup>,  
3 Scott C. Weaver<sup>2,3</sup>, Ping Ren<sup>4,#</sup>, Pei-Yong Shi<sup>1,3,5,6,7,8,#</sup>

4 <sup>1</sup>Department of Biochemistry and Molecular Biology, University of Texas Medical Branch,  
5 Galveston TX, U.S.A.

6 <sup>2</sup>Departments of Microbiology and Immunology, University of Texas Medical Branch, Galveston  
7 TX, U.S.A.

8 <sup>3</sup>Institute for Human Infection and Immunity, University of Texas Medical Branch, Galveston, TX,  
9 U.S.A.

10 <sup>4</sup>Department of Pathology, University of Texas Medical Branch, Galveston TX, U.S.A.

11 <sup>5</sup>Sealy Institute for Drug Discovery, University of Texas Medical Branch, Galveston, TX, U.S.A.

12 <sup>6</sup>Institute for Translational Sciences, University of Texas Medical Branch, Galveston, TX, U.S.A.

13 <sup>7</sup>Sealy Institute for Vaccine Sciences, University of Texas Medical Branch, Galveston, TX, U.S.A.

14 <sup>8</sup>Sealy Center for Structural Biology & Molecular Biophysics, University of Texas Medical Branch,  
15 Galveston, TX, U.S.A.

16 \*J.Z., H.X., and X.X. contributed equally to this study.

17 #Correspondence: P.R. (piren@utmb.edu) or P.-Y.S. (peshi@UTMB.edu)

18

## 19 Abstract

20 The explosive spread of the Omicron SARS-CoV-2 variant underscores the importance  
21 of analyzing the cross-protection from previous non-Omicron infection. We developed a high-  
22 throughput neutralization assay for Omicron SARS-CoV-2 by engineering the Omicron spike  
23 gene into an mNeonGreen USA-WA1/2020 SARS-CoV-2 (isolated in January 2020). Using this  
24 assay, we determined the neutralization titers of patient sera collected at 1- or 6-months after  
25 infection with non-Omicron SARS-CoV-2. From 1- to 6-month post-infection, the neutralization  
26 titers against USA-WA1/2020 decreased from 601 to 142 (a 4.2-fold reduction), while the  
27 neutralization titers against Omicron-spike SARS-CoV-2 remained low at 38 and 32, respectively.  
28 Thus, at 1- and 6-months after non-Omicron SARS-CoV-2 infection, the neutralization titers  
29 against Omicron were 15.8- and 4.4-fold lower than those against USA-WA1/2020, respectively.

30 The low cross-neutralization against Omicron from previous non-Omicron infection supports  
31 vaccination of formerly infected individuals to mitigate the health impact of the ongoing Omicron  
32 surge.

33

## 34 **Main**

35 Severe acute respiratory syndrome coronavirus 2 (SARS-CoV-2) continues to evolve,  
36 leading to the emergence of variants of concern (VoC), variants of interest, and variants of  
37 monitoring. These variants can increase viral transmission, immune evasion, and/or disease  
38 severity.<sup>1-3</sup> The recently emerged Omicron variant (B.1.1.529) was first identified in South Africa  
39 on November 2, 2021, and was designated as a new VoC on November 26, along with the four  
40 previous VoCs: Alpha, Beta, Gamma, and Delta.<sup>4</sup> Since its emergence, Omicron has rapidly  
41 spread to over 89 countries, with case doubling in as little as 1.5 to 3 days, leading to global  
42 surges of COVID-19 cases.<sup>5</sup> Compared to prior variants, the Omicron spike glycoprotein has  
43 accumulated more spike mutations, with over 34 mutations, many of which are known to evade  
44 antibody neutralization (e.g., K417N, N440K, S477N, E484A and Q493R) or to enhance  
45 spike/hACE2 receptor binding (e.g., Q498R, N501Y, and D614G).<sup>1,3,6,7</sup> The high number of  
46 spike mutations is associated with decreased potency of antibody therapy and increased  
47 breakthrough Omicron infections in vaccinated and previously infected individuals<sup>5</sup>. Laboratory  
48 studies are urgently needed to examine the susceptibility of Omicron SARS-CoV-2 to vaccine-  
49 and infection-elicited neutralization. This study aimed to examine the cross-neutralization of  
50 Omicron by antibodies derived from previous non-Omicron infection.

51 To measure neutralization of the Omicron variant, we developed a high-throughput  
52 assay. Using a previously established mNeonGreen (mNG) reporter USA-WA1/2020 SARS-  
53 CoV-2,<sup>8</sup> we swapped the original spike gene with an Omicron spike (BA.1 lineage; GISAID

54 EPI\_ISL\_6640916), resulting in recombinant mNG Omicron-spike SARS-CoV-2 (**Extended Data**  
55 **Fig. 1**). The mNG gene was placed at the open-reading-frame-7 (ORF7) of the viral genome.<sup>9</sup>  
56 The engineered Omicron spike contained mutations A67V, H69-V70 deletion ( $\Delta$ 69-70), T95I,  
57 G142D, V143-Y145 deletion ( $\Delta$ 143-145), N211 deletion ( $\Delta$ 211), L212I, L214 insertion EPE  
58 (Ins214EPE), G339D, S371L, S373P, S375F, K417N, N440K, G446S, S477N, T478K, E484A,  
59 Q493R, G496S, Q498R, N501Y, Y505H, T547K, D614G, H655Y, N679K, P681H, N764K,  
60 D796Y, N856K, Q954H, N969K, and L981F (**Extended Data Fig. 1**). The mNG Omicron-spike  
61 virus was sequenced to ensure no undesired mutations. After infecting Vero E6 cells, parental  
62 mNG USA-WA1/2020 developed larger fluorescent foci than Omicron-spike SARS-CoV-2  
63 (**Extended Data Fig. 2**); however, comparable infectious titers of  $>10^6$  focus-forming units per  
64 milliliter (FFU/ml) were obtained for both viruses. The mNG viruses were used to develop a  
65 fluorescent focus reduction neutralization test (FFRNT) as depicted in **Extended Data Fig. 3**.

66 We examined the cross-neutralization of non-Omicron SARS-CoV-2-infected patient  
67 sera against Omicron virus. Two panels of COVID-19 patient sera, one collected at 1-month  
68 post-infection (n=64) and another collected at 6-month post-infection (N=36), were measured for  
69 their 50% fluorescent focus reduction neutralization titers (FFRNT<sub>50</sub>, defined as the maximal  
70 dilution that neutralized 50% of foci) against both USA-WA1/2020 and Omicron-spike SARS-  
71 CoV-2. **Extended Data Tables 1** and **2** summarize the patient information (e.g., age, gender,  
72 race, date of positive viral test, symptom, and hospitalization) for the 1- and 6-month post-  
73 infection serum panels. All patients were infected before February 2021, prior to the emergence  
74 of the Omicron variant. The 1-month post-infection sera neutralized USA-WA1/2020 and  
75 Omicron-spike SARS-CoV-2 with geometric mean titers (GMTs) of 601 and 38, respectively  
76 (**Fig. 1a** and **Extended Data Fig. 4a**). Only one serum had a neutralization titer of  $<20$  against  
77 USA-WA1/2020, whereas 23 of 64 sera had neutralization titers of  $<20$  against Omicron-spike  
78 SARS-CoV-2 (**Fig. 1a**). Sera with high neutralization titers against USA-WA1/2020 were from

79 symptomatic patients, most were hospitalized (**Extended Data Table 1**), confirming that  
80 neutralizing antibody levels are associated with COVID-19 disease severity.<sup>10</sup> Notably, many of  
81 the sera with the highest neutralization titers of >3,450 against USA-WA1/2020 were from  
82 patients who had received convalescent plasma treatment (**Extended Data Table 1**).

83         The 6-month post-infection sera neutralized USA-WA1/2020 and Omicron-spike SARS-  
84 CoV-2 with GMTs of 142 and 32, respectively (**Fig. 1b and Extended Data Fig. 4b**). Consistent  
85 with the 1-month post-infection results, symptomatic hospitalized patients tended to have higher  
86 neutralization titers against USA-WA1/2020 than asymptomatic individuals (**Extended Data**  
87 **Table 2**). Thus, from 1- to 6-months post-infection, the mean neutralization titers against USA-  
88 WA1/2020 waned from 601 to 142 (a 4.2-fold decrease), while the neutralization titers against  
89 Omicron-spike virus remained low and nearly unchanged at 38 and 32, respectively. Consistent  
90 with our results, the waning neutralization overtime against non-Omicron SARS-CoV-2 was  
91 previously reported in naturally infected or vaccinated individuals.<sup>11-13</sup> Our data showed that 1-  
92 and 6-months after non-Omicron SARS-CoV-2 infections, the neutralization titers against  
93 Omicron were 15.8- and 4.4-fold lower than those against USA-WA1/2020, respectively. A similar  
94 range of neutralization reduction against the Omicron virus was reported for two-dose mRNA-  
95 vaccinated sera.<sup>14-16</sup> Collectively, these results demonstrate low cross-neutralization against the  
96 Omicron variant from previous non-Omicron viral infection or two-dose mRNA vaccination. The low  
97 cross-neutralization against the Omicron variant strongly suggests that individuals previously  
98 infected with SARS-CoV-2 should be vaccinated to mitigate Omicron-mediated infection,  
99 disease, and potential death.

100         Among all tested sera, only 6 pairs of 1- and 6-month samples were collected from same  
101 individuals (**Extended Data Tables 1 and 2**). Their neutralization patterns (**Extended Data Fig.**  
102 **5**) were similar to those observed with the means from complete 1- and 6-month serum panels.

103 Our study has several limitations. First, we have not defined the contributions of  
104 individual spike mutations to Omicron neutralization evasion. The constellation of Omicron spike  
105 mutations may result from selection for either viral transmission, immune escape, or both. The  
106 emergence of the Omicron variant in South Africa, where herd immunity is believed to be high,  
107 is consistent with evolutionary pressure for immune escape as suggested by our data and  
108 others.<sup>17</sup> Second, the genotypes of viruses that infected the patients whose sera were analyzed  
109 in this study were not defined, although the timing suggests the Alpha variant. Third, we have  
110 not analyzed other immune modulators. CD8<sup>+</sup> T cells and non-neutralizing antibodies that can  
111 mediate antibody-dependent cytotoxicity are known to protect patients from severe disease. The  
112 Omicron spike mutations may not dramatically affect T cell epitopes.<sup>18</sup>

113 The rapid evolution of SARS-CoV-2 underscores the importance of surveillance for new  
114 variants and their impact on viral transmission, disease severity, and immune evasion.  
115 Surveillance, laboratory investigation, and real-world vaccine effectiveness are essential to  
116 guide if and when an Omicron-specific vaccine or booster is needed. Currently, vaccination with  
117 booster shots,<sup>19,20</sup> together with masking and social distance, remain to be the most effective  
118 means to mitigate the health impact of Omicron surge. Finally, the high-throughput fluorescent  
119 neutralization assay reported in this study can expedite therapeutic antibody screening,  
120 neutralization testing, and modified vaccine development.

121

## 122 **Methods**

123 **Construction of recombinant viruses.** The recombinant mNeoGreen (mNG) Omicron-  
124 spike SARS-CoV-2 was constructed on the genetic background of an infectious cDNA clone  
125 derived from clinical strain WA1 (2019-nCoV/USA\_WA1/2020) containing an *mNG* reporter  
126 gene.<sup>9</sup> The Omicron spike mutations, including A67V, Δ69-70, T95I, G142D, Δ143-145, Δ211,

127 L212I, Ins214EPE, G339D, S371L, S373P, S375F, K417N, N440K, G446S, S477N, T478K,  
128 E484A, Q493R, G496S, Q498R, N501Y, Y505H, T547K, D614G, H655Y, N679K, P681H,  
129 N764K, D796Y, N856K, Q954H, N969K, and L981F, were engineered using a PCR-based  
130 mutagenesis protocol as reported previously.<sup>1</sup> The full-length genomic cDNAs were *in vitro*  
131 ligated and used as templates to transcribe full-length viral RNA. Mutant viruses were recovered  
132 on day 3 after Vero E6 cells were electroporated with the *in vitro* RNA transcripts. The  
133 harvested virus stocks were quantified for their infectious titers (fluorescent focus units) by  
134 titrating the viruses on Vero E6 cells in a 96-well plate after 16 h of infection. The genome  
135 sequences of the virus stocks were confirmed to have no undesired mutations by Sanger  
136 sequencing. The detailed protocol of genome sequencing was recently reported.<sup>21</sup>

137 **Serum specimens.** The research protocol regarding the use of human serum  
138 specimens was reviewed and approved by the University of Texas Medical Branch (UTMB)  
139 Institutional Review Board (IRB#: 20-0070). The de-identified convalescent sera from COVID-19  
140 patients (confirmed by the molecular tests with FDA's Emergency Use Authorization) were heat-  
141 inactivated at 56°C for 30 min before testing.

142 **Fluorescent focus reduction neutralization test.** Neutralization titers of human sera  
143 were measured by a fluorescent focus reduction neutralization test (FFRNT) using the mNG  
144 reporter SARS-CoV-2. Briefly, Vero E6 cells ( $2.5 \times 10^4$ ) were seeded in each well of black  
145  $\mu$ CLEAR flat-bottom 96-well plate (Greiner Bio-one™). The cells were incubated overnight at  
146 37°C with 5% CO<sub>2</sub>. On the following day, each serum was 2-fold serially diluted in the culture  
147 medium with the first dilution of 1:20. The diluted serum was incubated with 100-150 fluorescent  
148 focus units (FFU) of mNG SARS-CoV-2 at 37°C for 1 h (final dilution range of 1:20 to 1:20,480),  
149 after which the serum-virus mixtures were inoculated onto the pre-seeded Vero E6 cell  
150 monolayer in 96-well plates. After 1 h infection, the inoculum was removed and 100  $\mu$ l of overlay  
151 medium (DMEM supplemented with 0.8% methylcellulose, 2% FBS, and 1% P/S) was added to

152 each well. After incubating the plates at 37°C for 16 h, raw images of mNG fluorescent foci were  
153 acquired using Cytation™ 7 (BioTek) armed with 2.5x objective and processed using the default  
154 software setting. The foci in each well were counted and normalized to the non-serum-treated  
155 controls to calculate the relative infectivities. The curves of the relative infectivity versus the  
156 serum dilutions ( $\log_{10}$  values) were plotted using Prism 9 (GraphPad). A nonlinear regression  
157 method was used to determine the dilution fold that neutralized 50% of mNG SARS-CoV-2  
158 (defined as FFRNT<sub>50</sub>). Each serum was tested in duplicates.

159

## 160 **Statistics**

161 The nonparametric Wilcoxon matched-pairs signed rank test was used to analyze the  
162 statistical significance in **Figure 1**.

## 163 **Data availability**

164 The data that support the findings of this study are available from the corresponding  
165 authors upon request.

166

## 167 **References**

- 168 1 Plante, J. A. *et al.* Spike mutation D614G alters SARS-CoV-2 fitness. *Nature*,  
169 doi:10.1038/s41586-020-2895-3 (2020).
- 170 2 Xie, X. *et al.* Neutralization of SARS-CoV-2 spike 69/70 deletion, E484K and N501Y  
171 variants by BNT162b2 vaccine-elicited sera. *Nat Med* **27**, 620-621, doi:10.1038/s41591-  
172 021-01270-4 (2021).
- 173 3 Liu, Y. *et al.* The N501Y spike substitution enhances SARS-CoV-2 transmission. *Nature*,  
174 In press, doi:10.1101/2021.03.08.434499 (2021).
- 175 4 WHO. Classification of Omicron (B.1.1.529): SARS-CoV-2 Variant of Concern.  
176 [https://www.who.int/news/item/26-11-2021-classification-of-omicron-\(b.1.1.529\)-sars-](https://www.who.int/news/item/26-11-2021-classification-of-omicron-(b.1.1.529)-sars-cov-2-variant-of-concern)  
177 [cov-2-variant-of-concern](https://www.who.int/news/item/26-11-2021-classification-of-omicron-(b.1.1.529)-sars-cov-2-variant-of-concern) (2021).
- 178 5 Agency, U. H. S. SARS-CoV-2 variants of concern and variants under investigation in  
179 England. *Technical brief 31* (2021).
- 180 6 Chen, R. E. *et al.* Resistance of SARS-CoV-2 variants to neutralization by monoclonal  
181 and serum-derived polyclonal antibodies. *Nat Med* **27**, 717-726, doi:10.1038/s41591-  
182 021-01294-w (2021).

- 183 7 Ku, Z. *et al.* Molecular determinants and mechanism for antibody cocktail preventing  
184 SARS-CoV-2 escape. *Nature Communications*, [https://doi.org/10.1038/s41467-41020-](https://doi.org/10.1038/s41467-41020-20789-41467)  
185 20789-41467 (2021).
- 186 8 Muruato, A. E. *et al.* A high-throughput neutralizing antibody assay for COVID-19  
187 diagnosis and vaccine evaluation. *Nat Commun* **11**, 4059, doi:10.1038/s41467-020-  
188 17892-0 (2020).
- 189 9 Xie, X. *et al.* An Infectious cDNA Clone of SARS-CoV-2. *Cell Host Microbe* **27**, 841-848  
190 e843, doi:10.1016/j.chom.2020.04.004 (2020).
- 191 10 Gudbjartsson, D. F. *et al.* Humoral Immune Response to SARS-CoV-2 in Iceland. *N Engl*  
192 *J Med* **383**, 1724-1734, doi:10.1056/NEJMoa2026116 (2020).
- 193 11 Falsey, A. R. *et al.* SARS-CoV-2 Neutralization with BNT162b2 Vaccine Dose 3. *N Engl*  
194 *J Med*, doi:10.1056/NEJMc2113468 (2021).
- 195 12 Chia, W. N. *et al.* Dynamics of SARS-CoV-2 neutralising antibody responses and  
196 duration of immunity: a longitudinal study. *Lancet Microbe* **2**, e240-e249,  
197 doi:10.1016/S2666-5247(21)00025-2 (2021).
- 198 13 Widge, A. T. *et al.* Durability of Responses after SARS-CoV-2 mRNA-1273 Vaccination.  
199 *N Engl J Med* **384**, 80-82, doi:10.1056/NEJMc2032195 (2021).
- 200 14 Sandile Cele, L. J., Khadija Khan, David S Khoury, Thandeka Moyo-Gwete, Houriiyah  
201 Tegally, Cathrine Scheepers, Daniel Amoako, Farina Karim, Mallory Bernstein, Gila  
202 Lustig, Derseree Archary, Muneerah Smith, Yashica Ganga, Zesuliwe Jule, Kajal  
203 Reedoy, Deborah Cromer, James Emmanuel San, Shi-Hsia Hwa, Jennifer Giandhari,  
204 Jonathan M Blackburn, Bernadett I Gosnell, Salim S Abdool Karim, Willem Hanekom,  
205 NGS-SA; COMMIT-KZN Team; Anne von Gottberg, Jinal Bhiman, Richard J Lessells,  
206 Mahomed-Yunus S Moosa, Miles P Davenport, Tulio de Oliveira, Penny L Moore, Alex  
207 Sigal. SARS-CoV-2 Omicron has extensive but incomplete escape of Pfizer BNT162b2  
208 elicited neutralization and requires ACE2 for infection. *medRxiv*,  
209 doi:10.1101/2021.12.08.21267417 (2021).
- 210 15 Alexander Wilhelm, M. W., Katharina Grikscheit, Tuna Toptan, Barbara Schenk,  
211 Christiane Pallas, Melinda Metzler, Niko Kohmer, Sebastian Hoehl, Fabian A. Helfritz,  
212 Timo Wolf, Udo Goetsch, Sandra Ciesek. Reduced Neutralization of SARS-CoV-2  
213 Omicron Variant by Vaccine Sera and monoclonal antibodies. *MedRiv*,  
214 doi:<https://doi.org/10.1101/2021.12.07.21267432> (2021).
- 215 16 Wanwisa Dejnirattisai, R. H. S., Piyada Supasa, Chang Liu, Arabella SV Stuart, Andrew  
216 J Pollard, Xinxue Liu, Teresa Lambe, Derrick Crook, Dave I Stuart, Juthathip  
217 Mongkolsapaya, Jonathan S Nguyen-Van-Tam, Matthew D Snape, Gavin R Screaton,  
218 the Com-COV2 study group. Reduced neutralisation of SARS-COV-2 Omicron-  
219 B.1.1.529 variant by post-immunisation serum. *MedRxiv*,  
220 doi:<https://doi.org/10.1101/2021.12.10.21267534>.
- 221 17 Guardian, T. South Africa: previous infections may explain Omicron hospitalisation rate.  
222 [https://www.theguardian.com/world/2021/dec/20/2021/south-africa-previous-infections-may-](https://www.theguardian.com/world/2021/dec/20/2021/south-africa-previous-infections-may-explain-omicron-hospitalisation-rate?fr=operanews)  
223 explain-omicron-hospitalisation-rate?fr=operanews (2021).
- 224 18 Andrew D Redd, A. N., Hassen Kared, Evan M Bloch, Brian Abel, Andrew Pekosz,  
225 Oliver Laeyendecker, Michael Fehlings, Thomas C Quinn, Aaron AR Tobian. Minimal  
226 cross-over between mutations associated with Omicron variant of SARS-CoV-2 and  
227 CD8+ T cell epitopes identified in COVID-19 convalescent individuals. *BioRxiv*,  
228 doi:<https://doi.org/10.1101/2021.12.06.471446> (2021).
- 229 19 Henning Gruell, K. V., Pinkus Tober-Lau, David Hillus, Philipp Schommers, Clara  
230 Lehmann, Florian Kurth, Leif E. Sander, Florian Klein. mRNA booster immunization  
231 elicits potent neutralizing serum activity against the SARS-CoV-2 Omicron variant.  
232 *MedRiv*, doi:<https://doi.org/10.1101/2021.12.14.21267769> (2021).



- 233 20 Pfizer. Pfizer and BioNTech Provide Update on Omicron Variant.  
234 [https://www.pfizer.com/news/press-release/press-release-detail/pfizer-and-biontech-](https://www.pfizer.com/news/press-release/press-release-detail/pfizer-and-biontech-provide-update-omicron-variant)  
235 [provide-update-omicron-variant](https://www.pfizer.com/news/press-release/press-release-detail/pfizer-and-biontech-provide-update-omicron-variant) (2021).  
236 21 Xie, X. *et al.* Engineering SARS-CoV-2 using a reverse genetic system. *Nature Protocols*  
237 **16**, 1761-1784, doi:10.1038/s41596-021-00491-8 (2021).

238

## 239 **Acknowledgments**

240 We thank colleagues at Pfizer and the University of Texas Medical Branch for helpful  
241 discussion. P.-Y.S. was supported by NIH grants HHSN272201600013C, AI134907, AI145617,  
242 and UL1TR001439, and awards from the Sealy & Smith Foundation, the Kleberg Foundation,  
243 the John S. Dunn Foundation, the Amon G. Carter Foundation, the Gilson Longenbaugh  
244 Foundation, and the Summerfield Robert Foundation. S.C.W. was supported by NIH grant R24  
245 AI120942.

246

## 247 **Author contributions**

248 Conceptualization, X.X., P.R., P.-Y.S.; Methodology, J.Z., H.X., X.X., C.K., R.R.G.M.,  
249 S.C.W., P.R., P.-Y.S.; Investigation, J.Z., H.X., X.X., C.K., R.R.G.M., S.C.W., P.R., P.-Y.S.;  
250 Resources, H.X., S.C.W., P.R., P.-Y.S.; Data Curation, J.Z., H.X., X.X., P.R., P.-Y.S.; Writing-  
251 Original Draft, J.Z., H.X., X.X., R.R., P.-Y.S.; Writing-Review & Editing, X.X., S.C.W., P.R., P.-  
252 Y.S.; Supervision, X.X., S.C.W., P.R., P.-Y.S.; Funding Acquisition, S.C.W., P.-Y.S.

253

## 254 **Ethics declarations**

## 255 **Competing interests**

256           The authors declare competing interests. X.X. and P.-Y.S. have filed a patent on the  
257 reverse genetic system. J.Z., H.X., X.X., and P.-Y.S. received compensation from Pfizer for  
258 COVID-19 vaccine development. Other authors declare no competing interests.

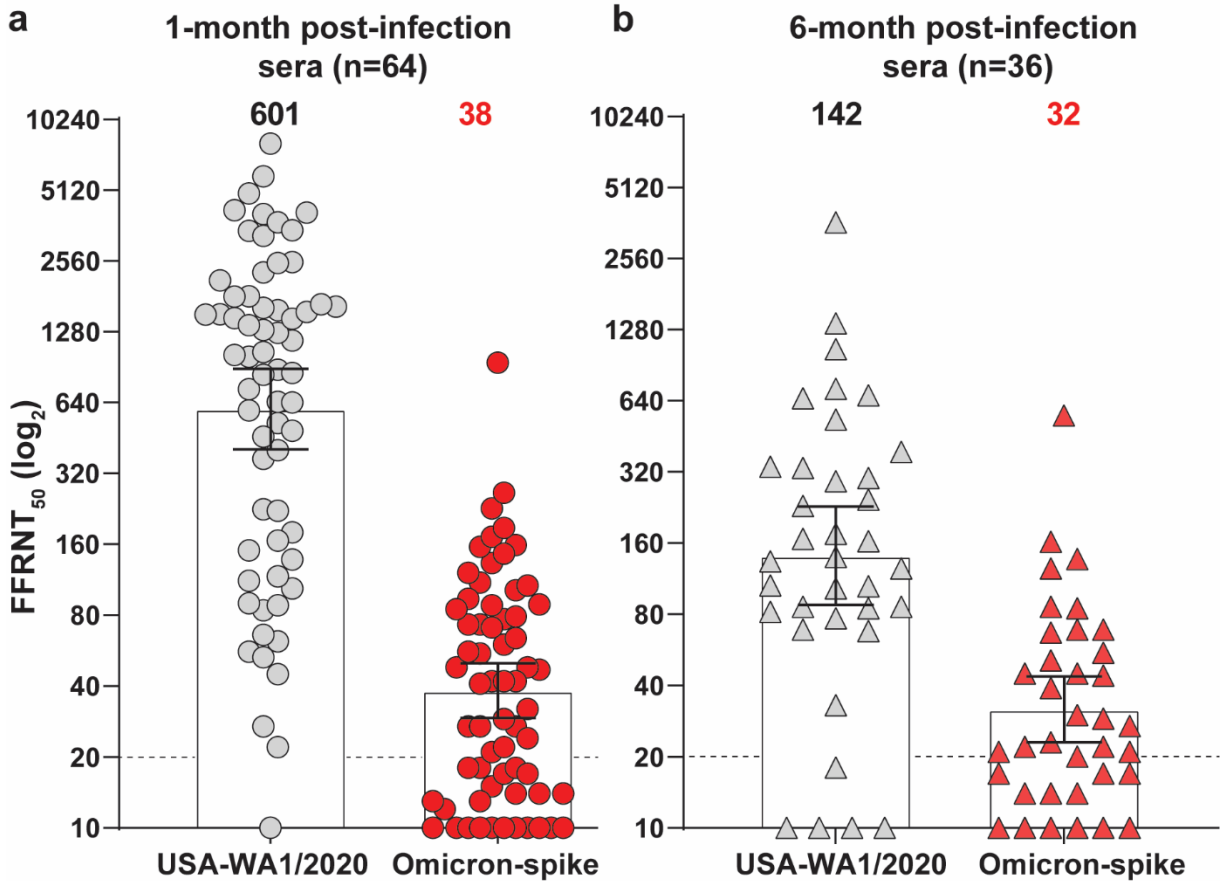

259

260 **Figure 1.** Reduced neutralization of Omicron SARS-CoV-2 by previous non-Omicron viral  
261 infection. 50% fluorescent focus reduction neutralization titers (FFRNT<sub>50</sub>) were measured for  
262 two serum panels from patients previously infected with non-Omicron SARS-CoV-2. The first  
263 serum panel was collected at 1-month post-infection (n=64) and the second panel collected at  
264 6-months post-infection (n=36). For each serum, FFRNT<sub>50</sub> values were determined against  
265 mNG USA-WA1/2020 and Omicron-spike SARS-CoV-2. **Extended Data Tables 1** and **2** summarize  
266 the FFRNT<sub>50</sub> values and serum information for (a) and (b), respectively. Each symbol of dots (a)  
267 and triangles (b) represents one serum specimen. The FFRNT<sub>50</sub> value for each serum was  
268 determined in duplicate assays and is presented as the geometric mean. The bar heights and  
269 the numbers above each set of data indicate geometric mean titers. The whiskers indicate 95%  
270 confidence intervals. The dotted line indicates the first serum dilution (1:20) of the FFRNT assay.  
271 The FFRNT<sub>50</sub> values of sera that did not show any inhibition of viral infection are presented as  
272 10 for plot purposes and statistical analysis. Statistical analysis was performed using the  
273 Wilcoxon matched-pairs signed-rank test. The statistical significance of the difference between  
274 the geometric mean titers against USA-WA1/2020 and Omicron-spike SARS-CoV-2 is p  
275 <0.0001 in both (a) and (b).  
276

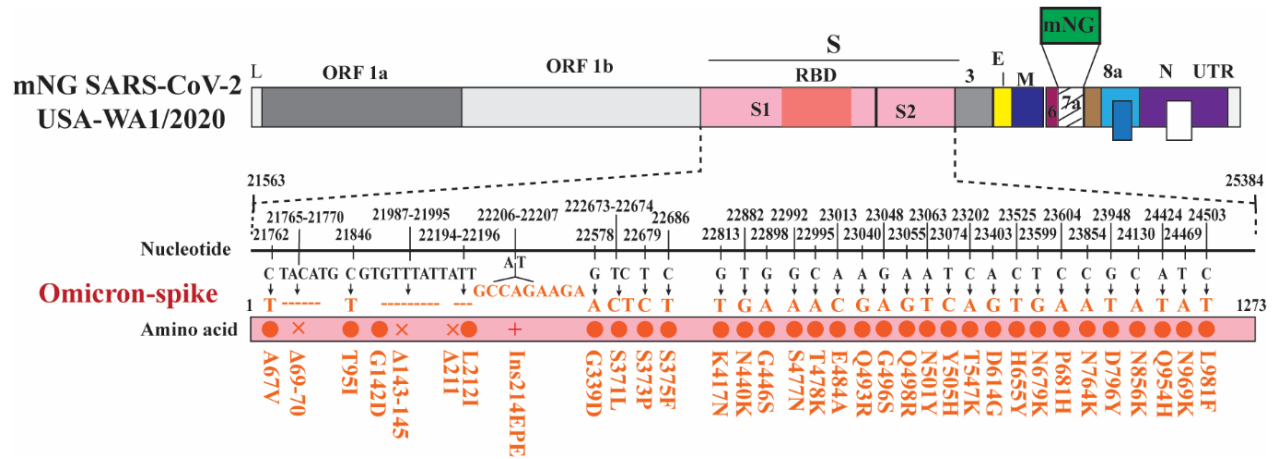

277

278 **Extended Data Figure 1.** Construction of mNeonGreen (mNG) Omicron-spike SARS-CoV-2.  
 279 mNG USA-WA1/2020 was used to engineer the complete *spike* gene from the Omicron variant,  
 280 resulting in mNG Omicron-spike SARS-CoV-2. Mutations (red circle), deletions (x), and  
 281 insertions (+) are indicated. Nucleotide and amino acid positions are depicted. L: leader  
 282 sequence; ORF: open reading frame; RBD: receptor binding domain; S: spike glycoprotein; S1:  
 283 N-terminal furin cleavage fragment of S; S2: C-terminal furin cleavage fragment of S; E:  
 284 envelope protein; M: membrane protein; N: nucleoprotein; UTR: untranslated region.

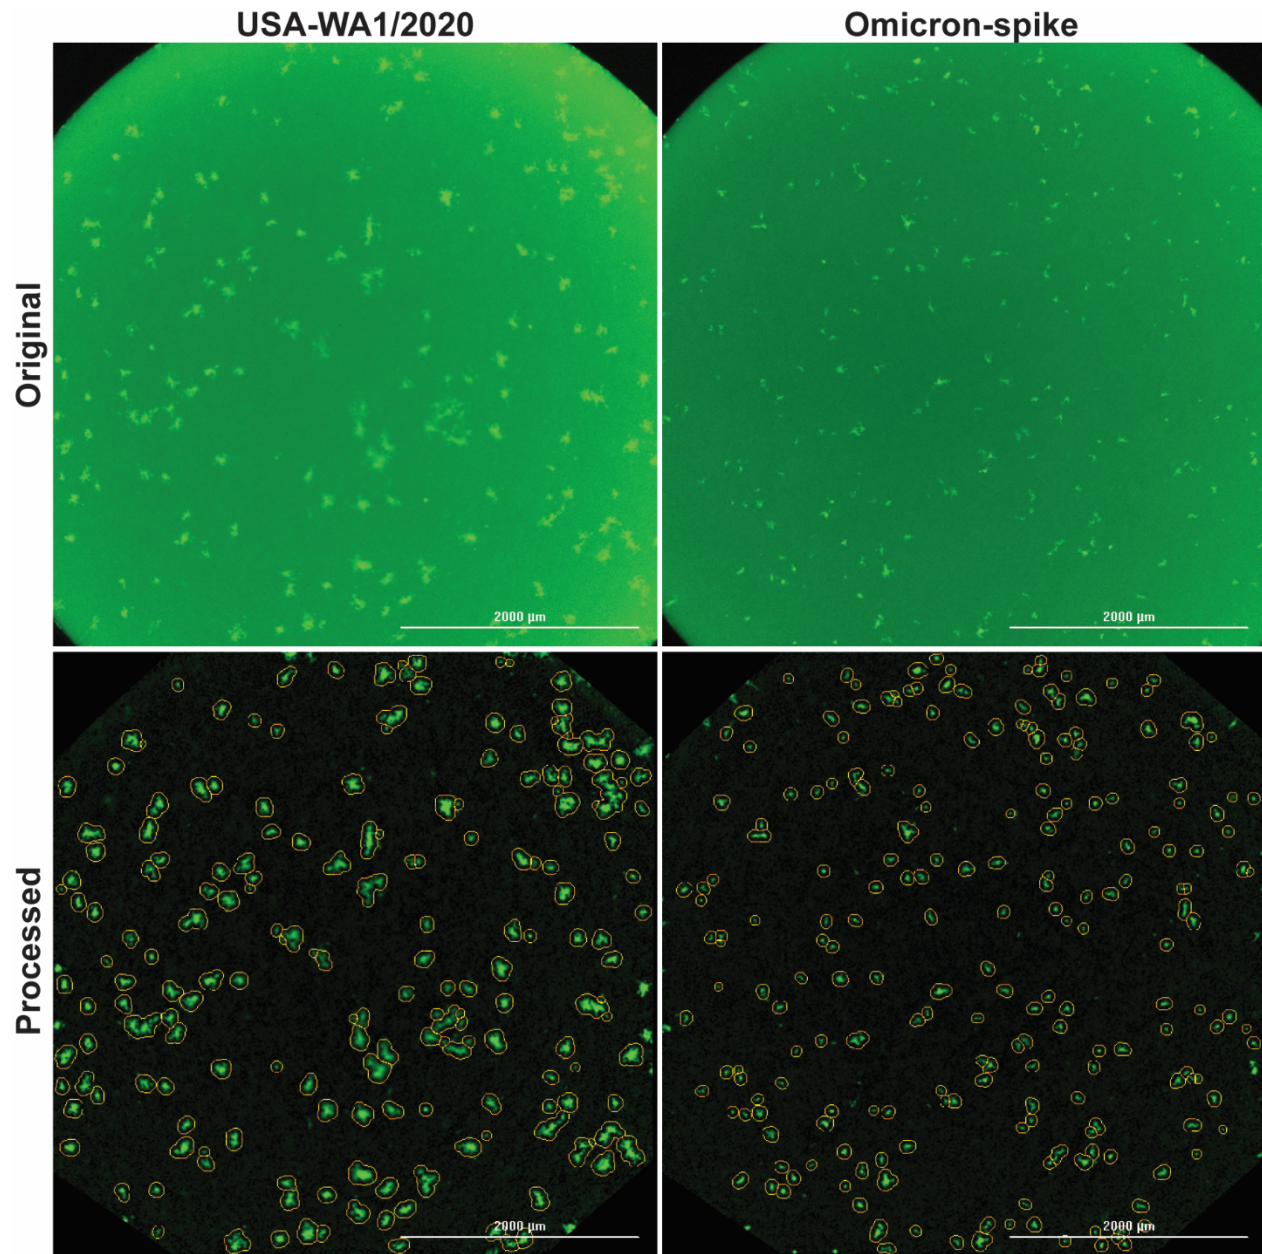

285

286 **Extended Data Figure 2.** Fluorescent foci of mNG USA-WA1/2020 and mNG Omicron-spike  
287 SARS-CoV-2 on Vero E6 cells. Original and processed images were collected by high-content  
288 imaging. The protocol of the fluorescent focus reduction neutralization test (FFRNT) is  
289 described in Methods. See **Extended Data Figure 3** for the experimental scheme of FFRNT.

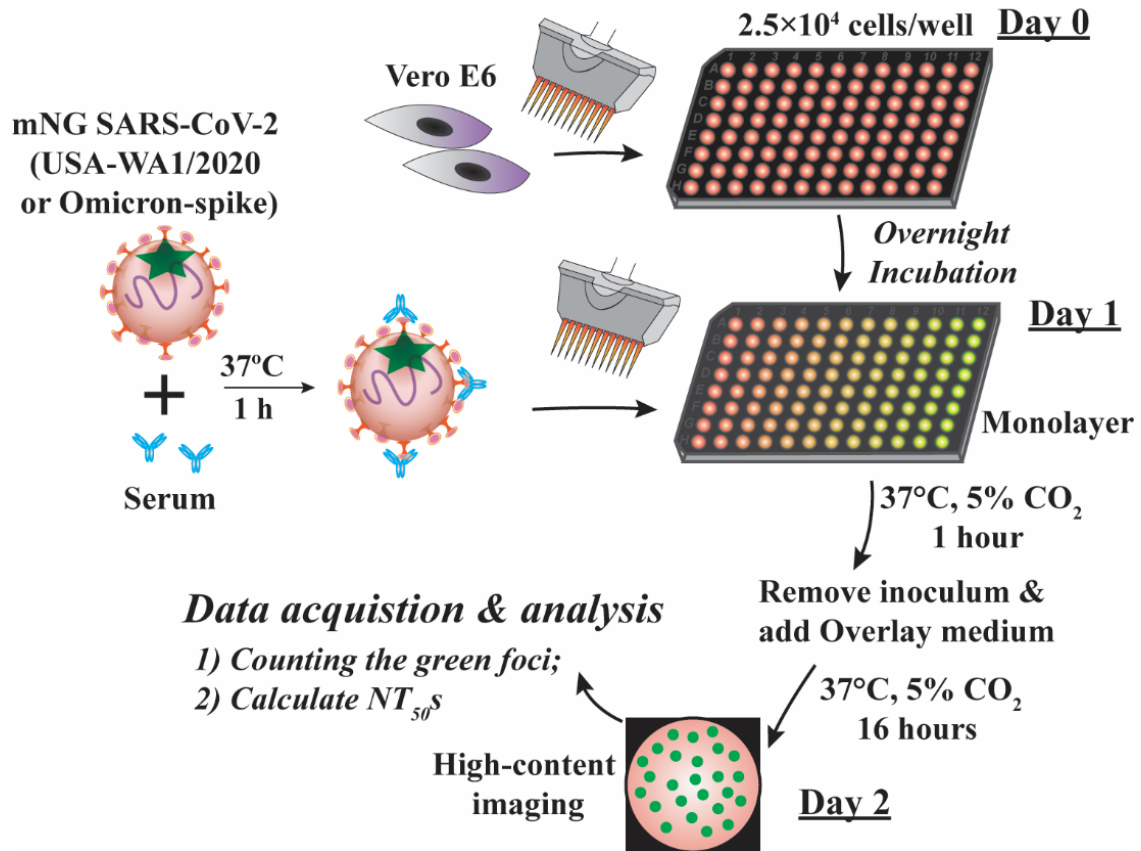

290

291

292 **Extended Data Figure 3.** Experimental scheme of fluorescent focus reduction neutralization  
293 test (FFRNT). The FFRNT protocol is described in Methods.

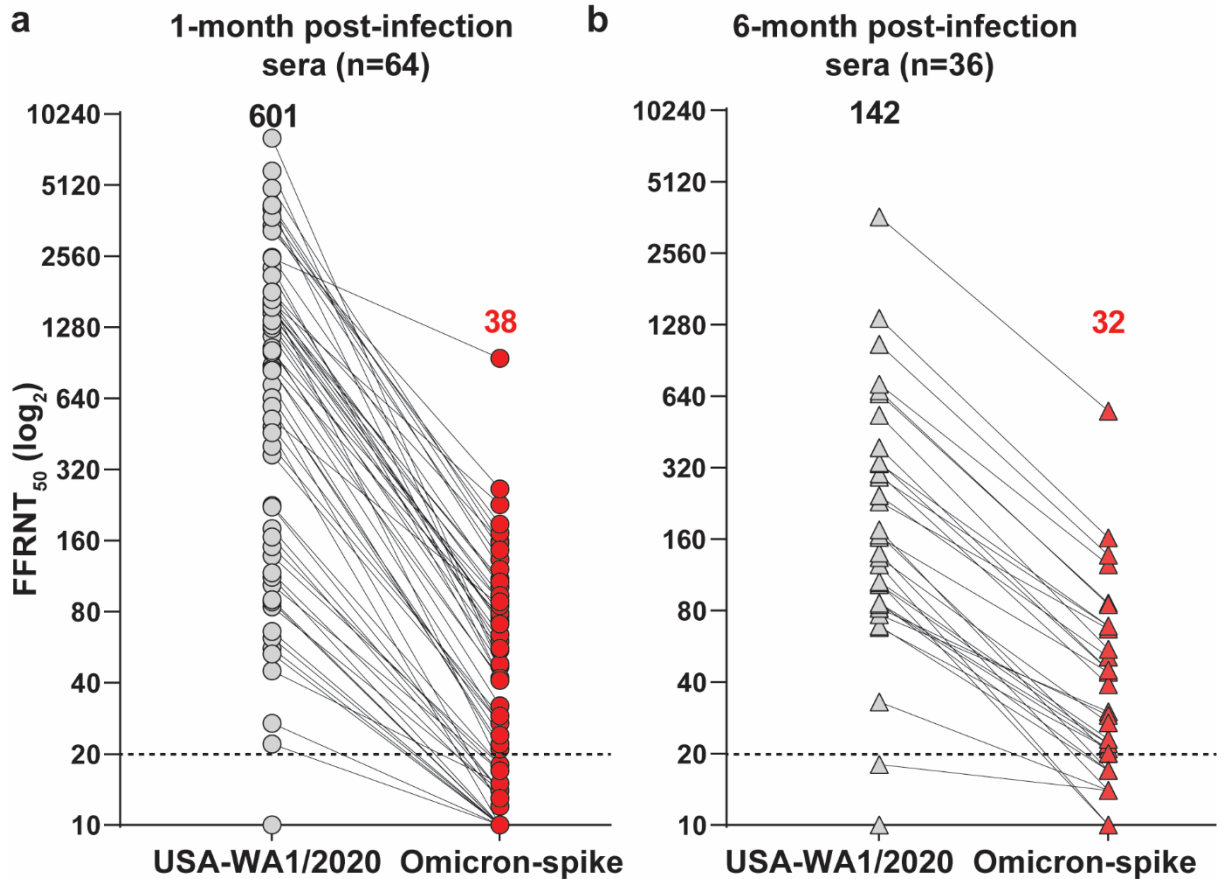

294

295 **Extended Data Figure 4.** Reduced neutralization against Omicron SARS-CoV-2 by previous  
296 non-Omicron viral infection. 50% fluorescent focus reduction neutralization titers (FFRNT<sub>50</sub>)  
297 were measured for two serum panels from COVID-19 patients previously infected with non-  
298 Omicron SARS-CoV-2. The first serum panel was collected at 1-month post-infection (n=64)  
299 and the second panel collected at 6-month post-infection (n=36). For each serum, two FFRNT<sub>50</sub>  
300 values against mNG USA-WA1/2020 and Omicron-spike SARS-CoV-2 are connected by a line.  
301 **a**, FFRNT<sub>50</sub>s of 1-month post-infection sera. **b**, FFRNT<sub>50</sub>s of 6-month post-infection sera.  
302 **Extended Data Tables 1** and **2** summarize the FFRNT<sub>50</sub> values and serum information for (a)  
303 and (b), respectively. This figure is a reformat of **Figure 1**.

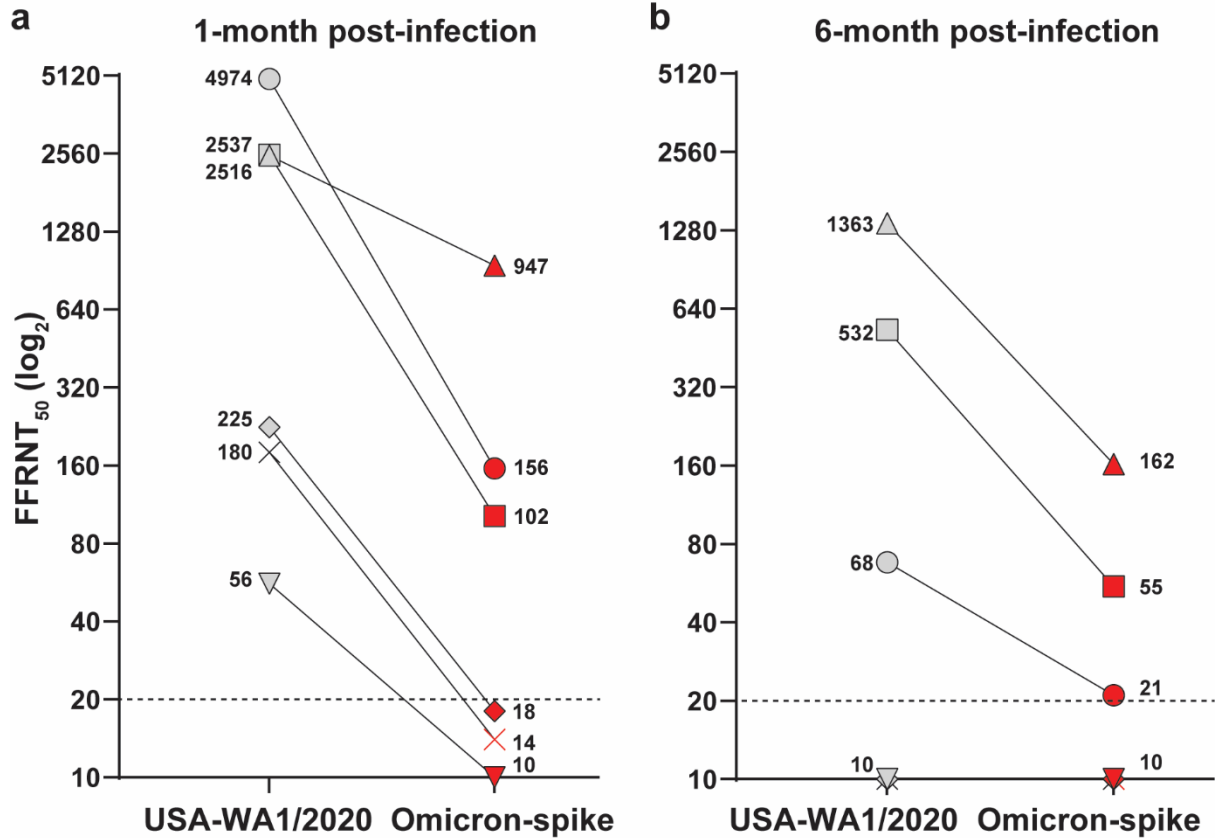

304

305

306 **Extended Data Figure 5.** FFRNT<sub>50</sub> of 6 pairs of 1- and 6-month post-infection sera from same  
307 patients. **a**, FFRNT<sub>50</sub>s of 1-month post-infection sera against mNG USA-WA1/2020 and  
308 Omicron-spike SARS-CoV-2. **b**, FFRNT<sub>50</sub>s of 6-month post-infection sera against mNG USA-  
309 WA1/2020 and Omicron-spike SARS-CoV-2.



310 **Extended Data Table 1.** FFRNT<sub>50</sub> values of 1-month post-infection sera against mNG USA-WA1/2020 and Omicron-spike SARS-CoV-2

| Serum ID | Age | Gender | Race and Ethnicity        | Sample collection date yielding positive viral test | Symptomatic | Hospitalized | FFRNT <sub>50</sub> |               |
|----------|-----|--------|---------------------------|-----------------------------------------------------|-------------|--------------|---------------------|---------------|
|          |     |        |                           |                                                     |             |              | USA-WA1/2020        | Omicron-spike |
| 1        | 21  | F      | Hispanic or Latino        | 7/22/2020                                           | No          | No           | 10                  | 10            |
| 2        | 38  | F      | White                     | 11/27/2020                                          | No          | No           | 22                  | 10            |
| 3        | 17  | M      | Hispanic or Latino        | 6/1/2020                                            | Yes         | No           | 27                  | 10            |
| 4        | 18  | F      | Hispanic or Latino        | 7/11/2020                                           | Yes         | No           | 45                  | 15            |
| 5        | 26  | F      | Hispanic or Latino        | 11/11/2020                                          | Yes         | No           | 53                  | 10            |
| 6        | 24  | F      | Hispanic or Latino        | 6/24/2020                                           | No          | No           | 56                  | 10            |
| 7        | 24  | F      | Hispanic or Latino        | 7/27/2020                                           | Yes         | No           | 62                  | 10            |
| 8        | 35  | F      | Hispanic or Latino        | 1/5/2021                                            | No          | No           | 66                  | 10            |
| 9        | 23  | F      | Hispanic or Latino        | 6/25/2020                                           | No          | No           | 84                  | 14            |
| 10       | 24  | F      | Hispanic or Latino        | 7/2/2020                                            | Yes         | No           | 88                  | 10            |
| 11       | 33  | F      | Black or African American | 11/21/2020                                          | Yes         | No           | 90                  | 10            |
| 12       | 26  | F      | Hispanic or Latino        | 7/2/2020                                            | Yes         | No           | 104                 | 17            |
| 13       | 60  | M      | White                     | 9/26/2020                                           | Yes         | Yes          | 112                 | 10            |
| 14       | 67  | M      | Caucasian/White           | 11/16/2020                                          | Yes         | No           | 117                 | 13            |
| 15       | 22  | M      | Hispanic or Latino        | 9/24/2020                                           | No          | No           | 138                 | 18            |
| 16       | 69  | M      | White                     | 12/28/2020                                          | Yes         | No           | 151                 | 17            |
| 17       | 73  | M      | White                     | 5/27/2020                                           | Yes         | No           | 166                 | 13            |
| 18       | 17  | F      | Hispanic or Latino        | 6/22/2020                                           | Yes         | No           | 180                 | 14            |
| 19       | 45  | M      | Hispanic or Latino        | 5/2/2020                                            | Yes         | Yes          | 222                 | 14            |
| 20       | 24  | F      | Hispanic or Latino        | 6/24/2020                                           | Yes         | No           | 225                 | 18            |
| 21       | 25  | F      | Black or African American | 7/16/2020                                           | No          | No           | 369                 | 27            |
| 22       | 75  | F      | Hispanic or Latino        | 9/14/2020                                           | Yes         | No           | 402                 | 29            |
| 23       | 80  | F      | White                     | 11/9/2020                                           | Yes         | Yes          | 459                 | 10            |
| 24       | 61  | F      | White                     | 11/3/2020                                           | Yes         | No           | 486                 | 27            |
| 25       | 78  | M      | White                     | 12/15/2020                                          | Yes         | No           | 524                 | 85            |
| 26       | 66  | M      | White                     | 5/30/2020                                           | Yes         | Yes          | 592                 | 12            |
| 27       | 38  | M      | Hispanic or Latino        | 6/27/2020                                           | No          | No           | 640                 | 24            |
| 28       | 34  | M      | Hispanic or Latino        | 11/11/2020                                          | Yes         | No           | 645                 | 22            |
| 29       | 25  | F      | Hispanic or Latino        | 7/17/2020                                           | No          | No           | 730                 | 21            |
| 30       | 66  | M      | Black or African American | 4/27/2020                                           | Yes         | Yes          | 840                 | 42            |
| 31       | 39  | M      | Black or African American | 4/9/2020                                            | Yes         | Yes          | 856                 | 27            |
| 32       | 35  | F      | Hispanic or Latino        | 10/15/2020                                          | Yes         | Yes          | 882                 | 77            |

|       |       |   |                           |            |     |     |         |       |
|-------|-------|---|---------------------------|------------|-----|-----|---------|-------|
| 33    | 55    | M | Hispanic or Latino        | 5/6/2020   | Yes | Yes | 1003    | 89    |
| *34   | 67    | F | Hispanic or Latino        | 1/4/2021   | Yes | Yes | 1020    | 41    |
| 35    | 55    | F | White                     | 9/28/2020  | Yes | No  | 1050    | 32    |
| 36    | 40    | F | Hispanic or Latino        | 12/20/2020 | Yes | No  | 1174    | 55    |
| 37    | 60    | F | Hispanic or Latino        | 11/27/2020 | Yes | Yes | 1268    | 48    |
| 38    | 65    | M | Hispanic or Latino        | 5/7/2020   | Yes | Yes | 1306    | 64    |
| *39   | 69    | M | White                     | 11/22/2020 | Yes | Yes | 1365    | 79    |
| 40    | 68    | M | Caucasian/White           | 5/10/2020  | Yes | Yes | 1454    | 73    |
| 41    | 50    | M | Black or African American | 4/8/2020   | Yes | Yes | 1465    | 60    |
| 42    | 63    | M | Hispanic or Latino        | 1/23/2021  | Yes | Yes | 1517    | 94    |
| 43    | 39    | M | Black or African American | 3/31/2020  | Yes | Yes | 1519    | 110   |
| 44    | 72    | M | White                     | 12/23/2020 | Yes | Yes | 1555    | 73    |
| 45    | 55    | F | White                     | 10/6/2020  | Yes | Yes | 1584    | 107   |
| 46    | 57    | M | White                     | 7/5/2020   | Yes | No  | 1618    | 18    |
| 47    | 1     | F | Hispanic or Latino        | 1/18/2021  | Yes | Yes | 1638    | 227   |
| 48    | 87    | M | White                     | 1/5/2021   | Yes | Yes | 1679    | 71    |
| 49    | 96    | F | White                     | 12/30/2020 | Yes | Yes | 1807    | 88    |
| 50    | 66    | M | Hispanic or Latino        | 12/19/2020 | Yes | No  | 1814    | 159   |
| 51    | 75    | M | Hispanic or Latino        | 10/27/2020 | Yes | No  | 2119    | 56    |
| 52    | 63    | F | Hispanic or Latino        | 12/12/2020 | Yes | Yes | 2289    | 42    |
| △53   | 66    | M | White                     | 12/27/2020 | Yes | Yes | 2516    | 947   |
| □54   | 49    | M | Black or African American | 1/3/2021   | No  | Yes | 2537    | 102   |
| 55    | 56    | M | Hispanic or Latino        | 7/13/2020  | Yes | Yes | 3277    | 265   |
| 56    | 44    | F | Black or African American | 8/20/20/   | Yes | Yes | 3443    | 133   |
| *57   | 83    | M | Hispanic or Latino        | 11/22/2020 | Yes | Yes | 3464    | 188   |
| *58   | 75    | M | White                     | 12/27/2020 | Yes | Yes | 3741    | 172   |
| *59   | 74    | M | White                     | 12/21/2020 | Yes | Yes | 4055    | 42    |
| 60    | 48    | F | Hispanic or Latino        | 6/21/2020  | Yes | Yes | 4116    | 121   |
| 61    | 78    | F | Hispanic or Latino        | 12/16/2020 | Yes | Yes | 4216    | 146   |
| ○*62  | 70    | M | Hispanic or Latino        | 12/12/2020 | Yes | Yes | 4974    | 156   |
| *63   | 49    | M | White                     | 12/29/2020 | Yes | Yes | 5876    | 47    |
| 64    | 50    | F | Hispanic or Latino        | 11/9/2020  | Yes | Yes | 8088    | 48    |
| GMT   | 44    | - | -                         | -          | -   | -   | 601     | 38    |
| 95%CI | 37-52 | - | -                         | -          | -   | -   | 405-891 | 29-50 |

311

312 \* Patients received convalescent plasma treatment.

313 ▽x◇△□○ Patients who gave both 1- and 6-month post-infection sera.

314 **Extended Data Table 2.** FFRNT<sub>50</sub> values of 6-month post-infection sera against mNG USA-WA1/2020 and Omicron-spike SARS-CoV-2

| Serum ID | Age | Gender | Race and Ethnicity        | Sample collection date yielding positive viral test | Symptomatic | Hospitalized | FFRNT <sub>50</sub> |               |
|----------|-----|--------|---------------------------|-----------------------------------------------------|-------------|--------------|---------------------|---------------|
|          |     |        |                           |                                                     |             |              | USA-WA1/2020        | Omicron-spike |
| ▽1       | 17  | F      | Hispanic or Latino        | 6/22/2020                                           | Yes         | No           | 10                  | 10            |
| × 2      | 24  | F      | Hispanic or Latino        | 6/24/2020                                           | No          | No           | 10                  | 10            |
| ◇3       | 24  | F      | Hispanic or Latino        | 6/24/2020                                           | Yes         | No           | 10                  | 10            |
| 4        | 70  | M      | White                     | 7/26/2020                                           | No          | No           | 10                  | 10            |
| 5        | 29  | F      | Black or African American | 8/3/2020                                            | No          | No           | 18                  | 14            |
| 6        | 21  | F      | Hispanic or Latino        | 6/26/2020                                           | No          | No           | 33                  | 14            |
| ○*7      | 70  | M      | Hispanic or Latino        | 12/12/2020                                          | Yes         | Yes          | 68                  | 21            |
| 8        | 27  | F      | Hispanic or Latino        | 8/9/2020                                            | No          | No           | 69                  | 17            |
| 9        | 22  | F      | Hispanic or Latino        | 10/1/2020                                           | No          | No           | 77                  | 30            |
| 10       | 61  | F      | White                     | 8/24/2020                                           | No          | No           | 82                  | 29            |
| 11       | 40  | F      | Hispanic or Latino        | 7/31/2020                                           | Yes         | No           | 85                  | 21            |
| 12       | 22  | F      | Hispanic or Latino        | 7/13/2020                                           | No          | No           | 86                  | 22            |
| 13       | 50  | F      | White                     | 11/25/2020                                          | Yes         | Yes          | 86                  | 17            |
| 14       | 26  | F      | Hispanic or Latino        | 9/10/2020                                           | No          | No           | 103                 | 22            |
| 15       | 21  | F      | Hispanic or Latino        | 6/2/2020                                            | Yes         | No           | 105                 | 10            |
| 16       | 26  | F      | Hispanic or Latino        | 9/10/2020                                           | No          | No           | 106                 | 23            |
| 17       | 73  | F      | White                     | 10/14/2020                                          | Yes         | Yes          | 125                 | 10            |
| 18       | 22  | M      | Hispanic or Latino        | 9/24/2020                                           | Yes         | Yes          | 134                 | 27            |
| 19       | 47  | M      | Black or African American | 4/23/2020                                           | No          | No           | 140                 | 14            |
| 20       | 79  | M      | White                     | 5/4/2020                                            | Yes         | Yes          | 163                 | 44            |
| **21     | 77  | F      | Black or African American | 12/7/2020                                           | Yes         | No           | 167                 | 20            |
| 22       | 57  | M      | White                     | 5/13/2020                                           | Yes         | Yes          | 175                 | 17            |
| 23       | 23  | F      | Hispanic or Latino        | 12/25/2020                                          | Yes         | No           | 230                 | 67            |
| 24       | 40  | F      | Hispanic or Latino        | 3/16/2020                                           | Yes         | No           | 244                 | 51            |
| 25       | 22  | F      | Hispanic or Latino        | 8/11/2020                                           | Yes         | No           | 292                 | 69            |
| 26       | 54  | M      | White                     | 4/10/2020                                           | Yes         | Yes          | 302                 | 39            |
| 27       | 64  | M      | White                     | 1/3/2021                                            | Yes         | Yes          | 333                 | 69            |
| 28       | 39  | F      | Black or African American | 7/9/2020                                            | Yes         | No           | 337                 | 45            |
| 29       | 69  | M      | White                     | 8/14/2020                                           | Yes         | No           | 389                 | 45            |
| □30      | 49  | M      | Black or African American | 1/3/2021                                            | Yes         | Yes          | 532                 | 55            |
| 31       | 96  | F      | White                     | 12/30/2020                                          | Yes         | Yes          | 655                 | 86            |
| 32       | 80  | F      | Hispanic or Latino        | 6/20/2020                                           | Yes         | No           | 675                 | 85            |

|        |       |   |                    |            |     |     |        |       |
|--------|-------|---|--------------------|------------|-----|-----|--------|-------|
| 33     | 49    | F | Hispanic or Latino | 3/26/2020  | Yes | No  | 719    | 125   |
| 34     | 48    | F | Hispanic or Latino | 6/21/2020  | Yes | Yes | 1059   | 137   |
| Δ35    | 66    | M | White              | 12/27/2020 | Yes | Yes | 1363   | 162   |
| 36     | 70    | M | Hispanic or Latino | 11/19/2020 | Yes | Yes | 3648   | 554   |
| GMT    | 41    | - | -                  | -          | -   | -   | 142    | 32    |
| 95% CI | 35-49 | - | -                  | -          | -   | -   | 88-229 | 23-44 |

315

316 \* Patients received convalescent plasma treatment.

317 \*\* Patient received therapeutic antibody treatment.

318 ▽x◇Δ□ Patients who gave both 1- and 6-month post-infection sera.
